# Supplementary material for: Enhanced adsorption–catalysis combination for the removal of sulphur from fuels using polyoxometalates supported on amphipathic hybrid mesoporous silica nanoparticles
Source: Royal Society of Chemistry journal article supplement (doi:10.1039/d3dt01725g), 2023-01-01
Supplement: d3dt01725g1.pdf [file d3dt01725g1.pdf]

1 **Enhanced Adsorption-Catalysis Combination in the Removal of Sulphur from Fuels using**  
2 **Polyoxometalate supported on Amphipathic Hybrid Mesoporous Silica Nanoparticles.**

3 **Josefa Ortiz-Bustos<sup>a</sup>, Helena Pérez del Pulgar<sup>a</sup>, Yolanda Pérez<sup>a,b\*</sup>, Isabel del Hierro<sup>a\*</sup>**

4 <sup>a</sup>Departamento de Biología y Geología, Física y Química Inorgánica. Escuela Superior de Ciencias  
5 Experimentales y Tecnología. Universidad Rey Juan Carlos, 28933 Móstoles (Madrid), Spain.

6 <sup>b</sup> Advanced Porous Materials Unit, IMDEA Energy, Av. Ramón de la Sagra 3, 28935, Móstoles,  
7 Madrid, Spain.

8 E-mail: [isabel.hierro@urjc.es](mailto:isabel.hierro@urjc.es); [yolanda.cortes@urjc.es](mailto:yolanda.cortes@urjc.es)

9 **Supplementary Material**

10 **Experimental Section.**

11 The following reactants were acquired from Merck and used as received tetraethylorthosilicate  
12 (TEOS) 98 %, poly(ethylene glycol)-block-poly(propylene glycol)-block-poly(ethylene glycol)  
13 (Pluronic P123), trimethylamine (4.2 M in ethanol), 3-glycidyloxypropyl)trimethoxysilane,  
14 sodium hydroxide, hydrogen peroxide solution 30 % (H<sub>2</sub>O<sub>2</sub>), trimethoxymethylsilane  
15 (MeSi(OMe)<sub>3</sub>), hexamethyldisilazane (Me<sub>3</sub>Si)<sub>2</sub>NH and phenyltriethoxysilane (PhSi(OEt)<sub>3</sub>).  
16 Dibenzothiophene was purchased from Sigma Aldrich. Hexadecyltrimethylammonium bromide  
17 (CTBA) and phosphomolybdic acid solution (H<sub>3</sub>[PMo<sub>12</sub>O<sub>40</sub>] 20 % ethanol) were purchased from  
18 Acros Organics and used as received. Dodecane ≥ 99.8 % was acquired from Alfa Aesar, 2-  
19 propanol from VWR Chemicals and 2-(diphenylphosphino)ethyltriethoxysilane  
20 (PPh<sub>2</sub>Et<sub>2</sub>Si(OEt)<sub>3</sub>) and n-octane from Fluorochem. Nitric and hydrochloric acids were purchased  
21 from Scharlau. Toluene, dichloromethane, and ethanol were purchased from SDS and distilled  
22 and dried from appropriate drying agents <sup>1</sup>.

23 **Characterization Techniques**

24 X-Ray diffraction (XRD) patterns of the materials were obtained on a Phillips Diffractometer  
25 model PW3040/00 X'Pert MPD/MRD at 45 KV and 40 mA, with Cu-K $\alpha$  radiation ( $\lambda=1.5418$  Å).  
26 The adsorption-desorption isotherms of N<sub>2</sub> gas were acquired using a Micromeritics TriStar 3000  
27 analyzer, and based on the adsorption branch, pore size distributions were calculated using the  
28 Barret- Joyner-Halenda (BJH) model. Thermogravimetric analysis was carried out using a Star  
29 System Mettler Thermobalance and infrared spectra were recorded on a Nicolet-550 FT-IR  
30 spectrophotometer (in the region 4000 to 400 cm<sup>-1</sup>) as KBr disks. <sup>1</sup>H NMR spectra were recorded  
31 on a Varian Mercury FT-400 spectrometer. Structural characterization was completed via  
32 transmission electron microscopy (TEM) using a PHILIPS TECNAI-10 electronic microscope  
33 operated at 200 kV. The electrochemical studies were recorded with a potentiostat/galvanostat  
34 Autolab PGSTAT302 equipped with a FRA32M module for EIS measurements. Modified carbon  
35 paste electrodes (MCPE) were used as working electrode and were prepared by mixing graphite  
36 (electrochemical quality), the hybrid mesoporous nanospheres and nujol as agglutinant. The  
37 mixture was capped in a Teflon electrode with copper electrical connexions. <sup>31</sup>P MAS NMR  
38 spectra were recorded at room temperature on a Bruker Avance III/HD spectrometer and a 4mm  
39 double resonance probe at MAS rates of 10 KHz, referenced to external standard of ammonium  
40 dihydrogen phosphate at 0.69 ppm. These ones were analyzed by cross polarization and 4096

1 scans were collected with a recycle delay of 5 s and a contact time of 5 ms. <sup>95</sup>Mo MAS NMR  
 2 spectra were performed at 26.05 MHz using a Bruker Avance III/HD spectrometer with a wide-  
 3 bore 9.4 T magnet. The spectra were recorded employing a 4.0 mm low frequency probe at MAS  
 4 rate of 12 KHz, referenced to the external standard Mo(CO)<sub>6</sub> at δ = -1850 ppm. The sequence  
 5 used to obtain these spectra was a pulse with spinal 64 decoupling, a recycle delay of 5 s and  
 6 the number of scans was chosen to achieve a good signal to noise ratio. Zeta potential was  
 7 measured by suspending the samples in a buffered solution of 1 mg ml<sup>-1</sup> at pH = 7 and using a  
 8 Zetasizer Nano ZS Malvern Panalytical. X-ray photoelectron (XPS) spectra were recorded with a  
 9 SPECS spectrometer equipped with a Phoibos150 MCD analyzer and using a non-  
 10 monochromatic MgAlα. CASAXPS software was used for spectra treatment and quantification.  
 11 Last, X-Ray Fluorescence (XRF) spectra were recorded in a Panalytical spectrometer MagiX  
 12 model. The contact angle was measured with an optic goniometer, ramé-hart instrument.

13 Table S1. Heteropolyanion content measured by XRF and ICP

| Material                       | XRF<br>mmol/g | ICP<br>mmol/g |
|--------------------------------|---------------|---------------|
| POM-PPh <sub>2</sub> -Chol-MSN | 0.22          | 0.18          |
| POM-Ph-Chol-MSN                | 0.16          | 0.14          |
| POM-Me-Chol-MSN                | 0.2           | 0.17          |

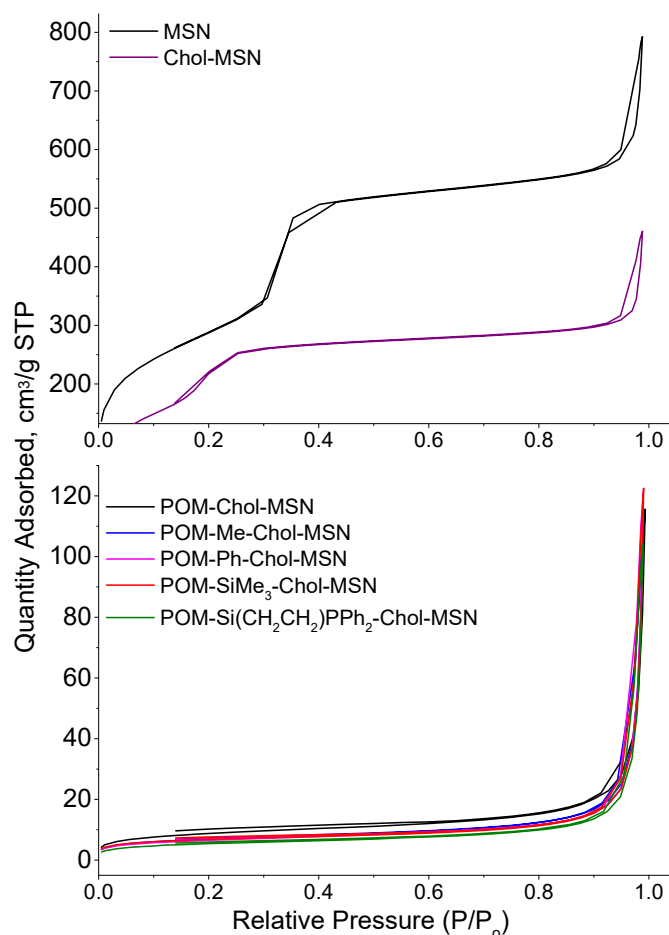

14

15 Figure S1. N<sub>2</sub> adsorption/desorption isotherms of POM-R-Chol-MSN materials in comparison to  
 16 pristine Chol-MSN and MSN.

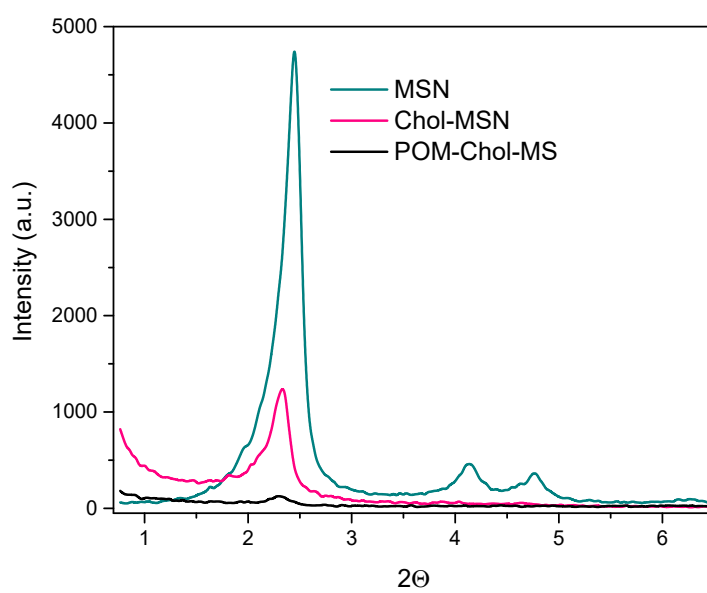

1

2 Figure S2. XRD patterns of pristine MSN and hybrid Chol-MSN and POM-Chol-MSN materials.

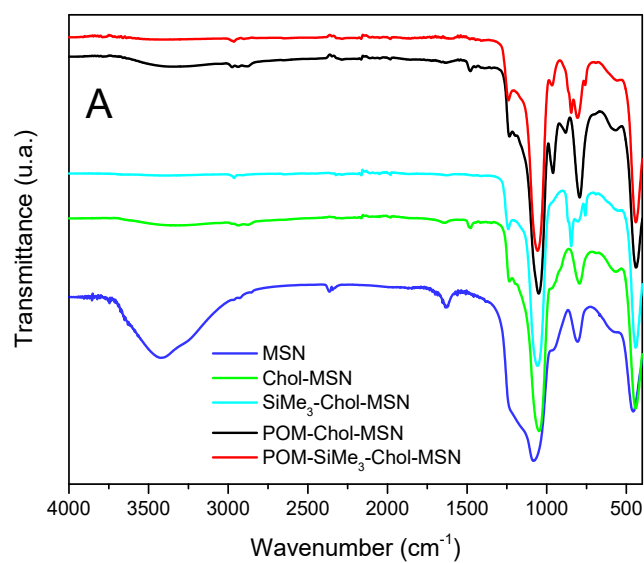

3

4

5

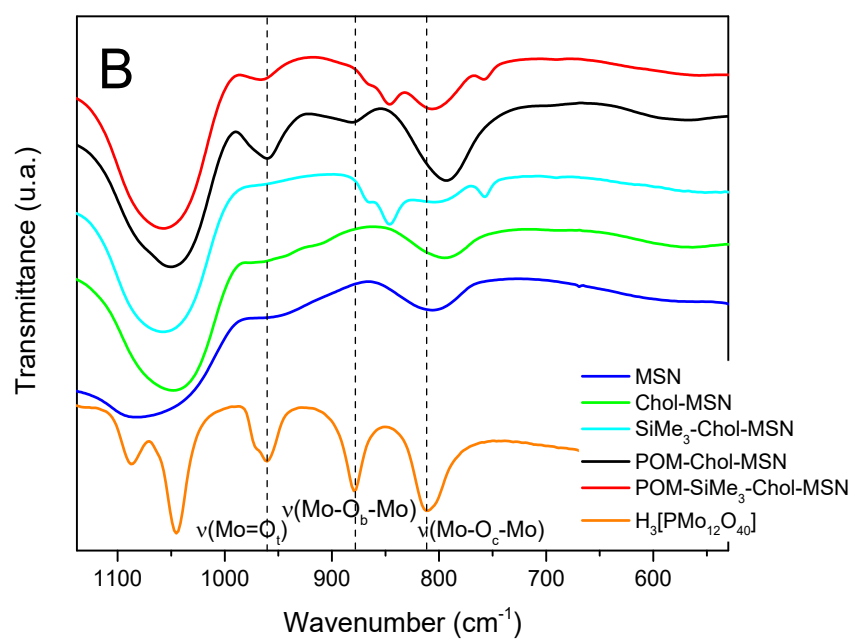

1

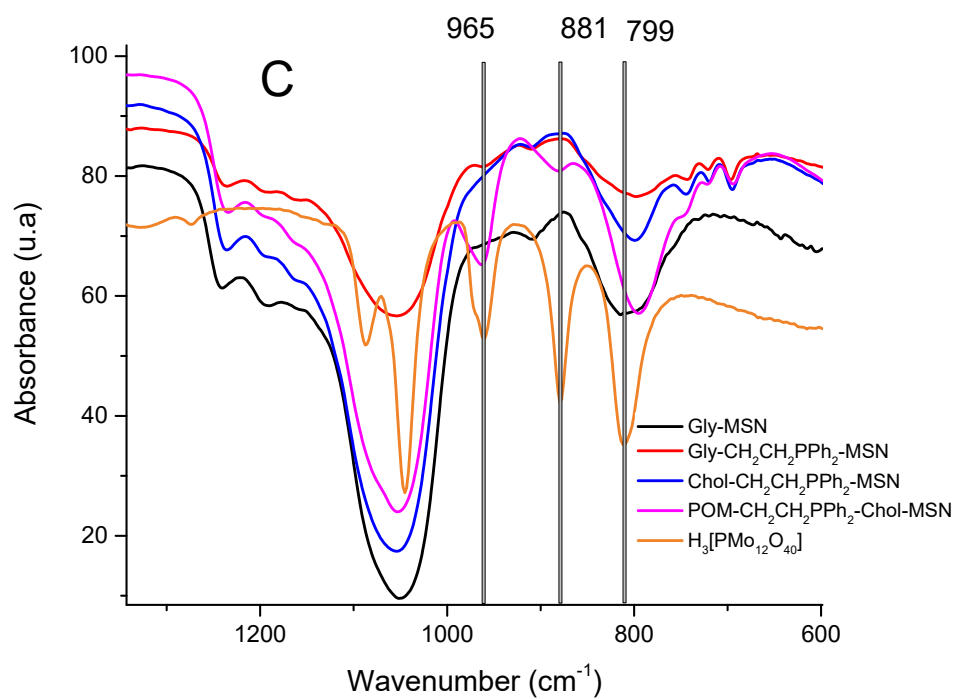

2

3 Figure S3. FTIR step by step in the synthesis of POM-SiMe<sub>3</sub>-Chol-MSN (A and B) and POM-  
 4 SiCH<sub>2</sub>CH<sub>2</sub>PPh<sub>2</sub>-Chol-MSN (C) as representative materials.

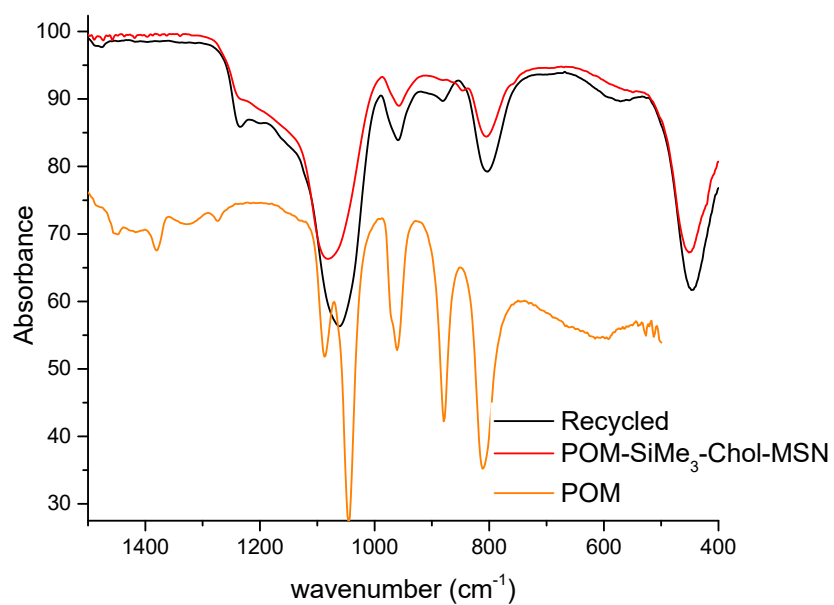

1

2 Figure S4. FTIR of recycled of POM-SiMe<sub>3</sub>-Chol-MSN after first run.

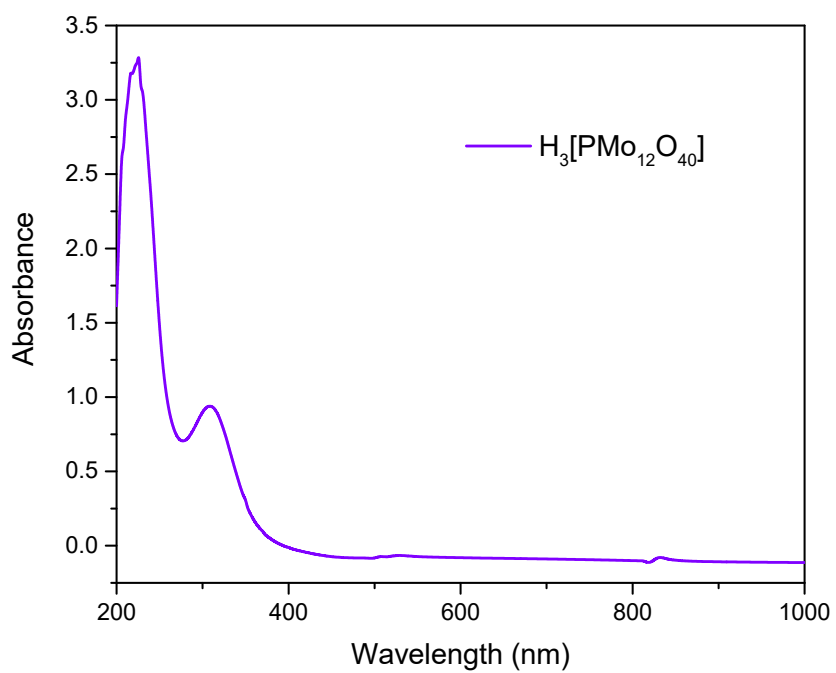

3

4 Figure S5. UV-vis spectrum of phosphomolybdic acid in ethanol, H<sub>3</sub>[PMo<sub>12</sub>O<sub>40</sub>] at 0.05 mg mL<sup>-1</sup>

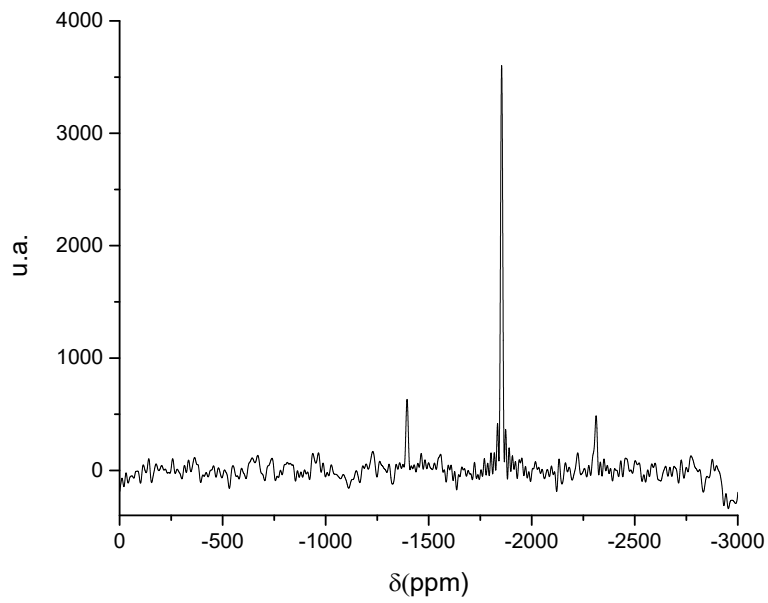

1

2 Figure S6.  $^{95}\text{Mo}$  MAS NMR spectra for  $\text{Mo}(\text{CO})_6$  with  $\delta = -1850$  ppm and line width ( $W_{1/2}$ ) = 0,31  
 3 kHz performed at 26.05 MHz at MAS rate of 12 KHz (9,4 T).

4

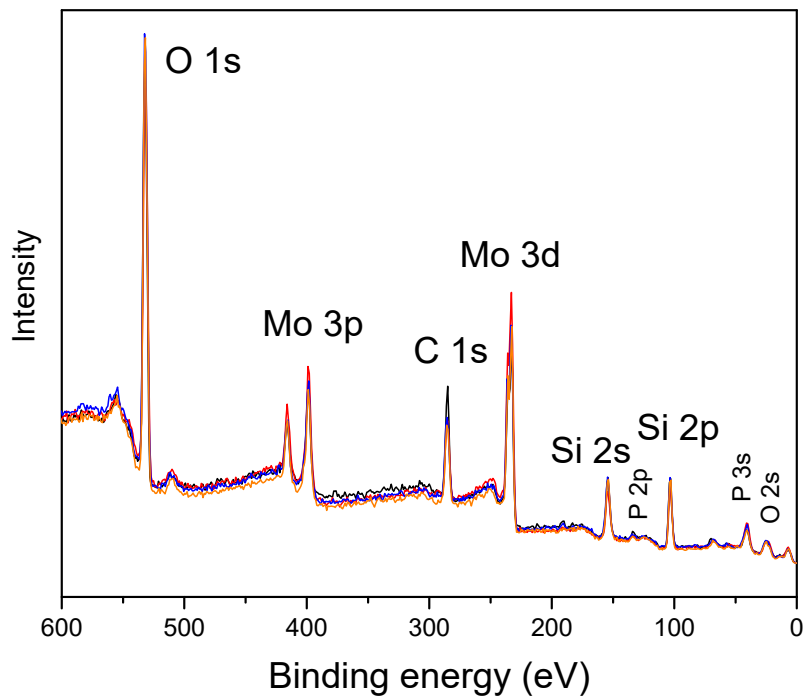

5

6 Figure S7. XPS spectra of unsilylated POM-Chol-MSN and silylated POM-R-Chol-MSN materials

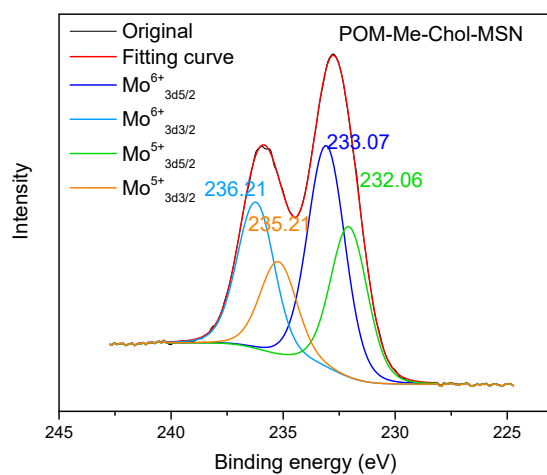

1

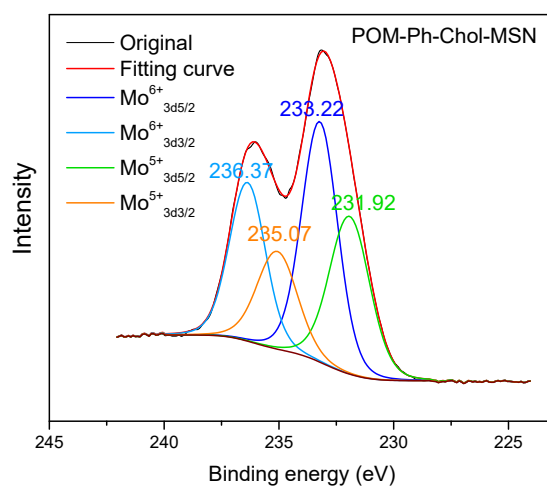

2

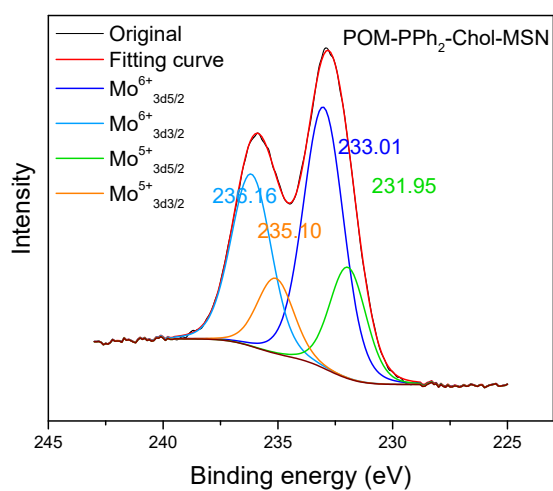

3

4 Figure S8. XPS spectra of Mo 3d silylated POM-R-Chol-MSN materials.

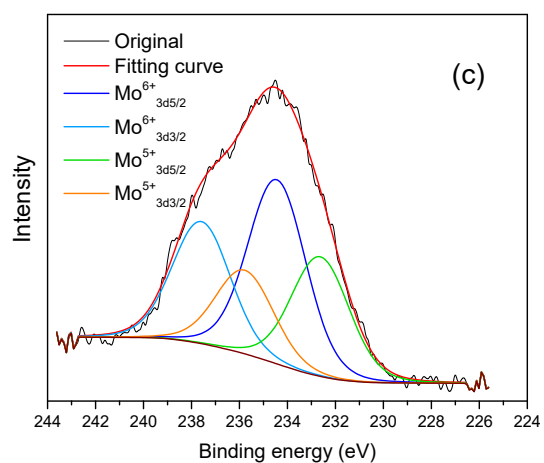

1

2 Figure S9. XPS spectra of Mo 3d recycled POM-Chol-MSN material.

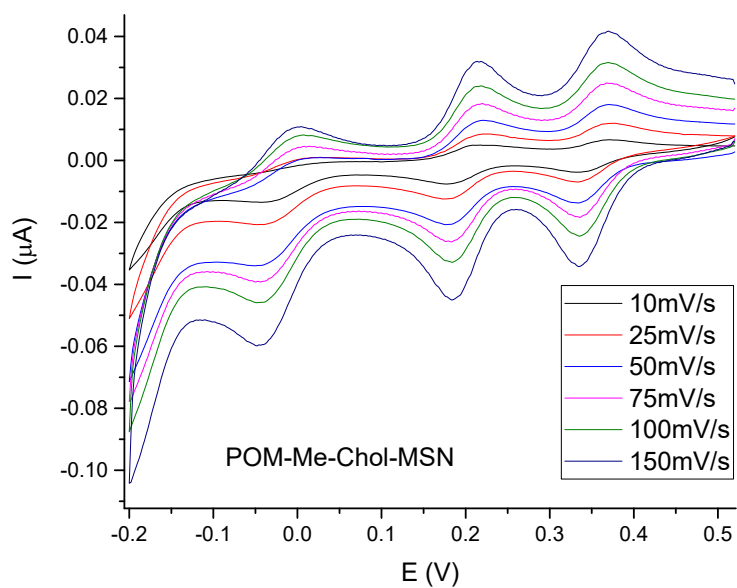

3



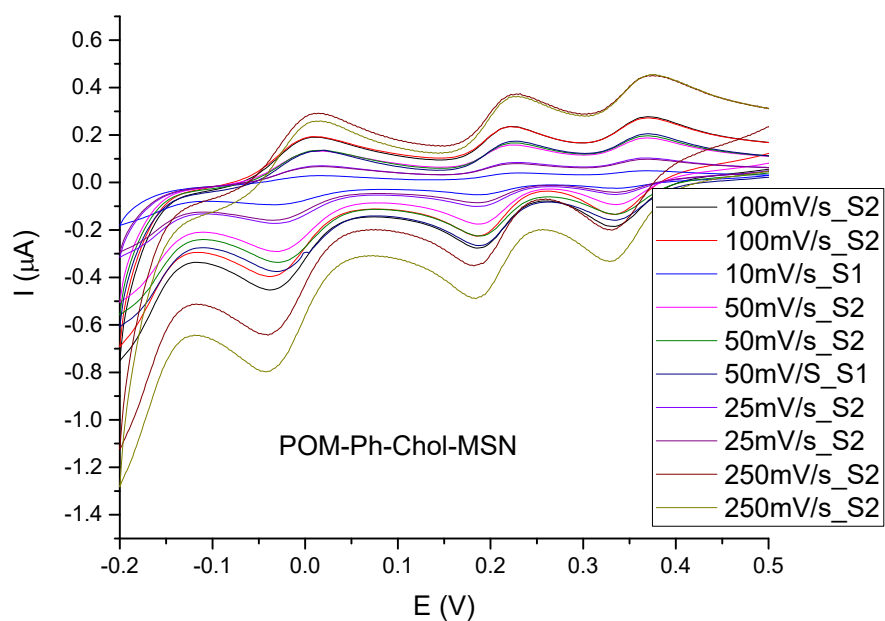

1

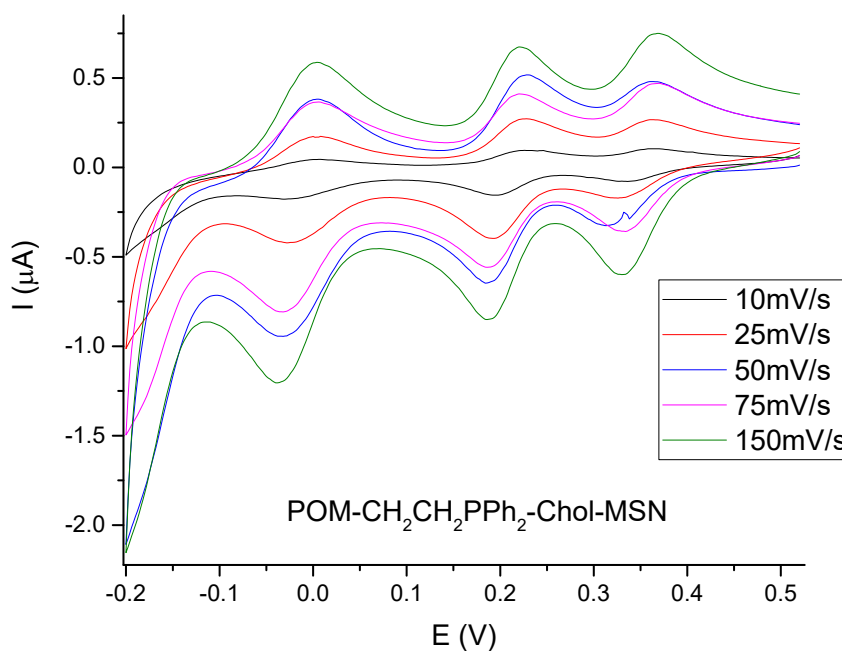

2

3 Figure S10. Cyclic voltammograms of silylated POM-R-Chol-MSN materials immobilized on a  
 4 carbon modified electrode as working electrode in nitrogen saturated aqueous 0.5 M H<sub>2</sub>SO<sub>4</sub> vs  
 5 an Ag/AgCl/KCl (3 M) reference electrode and a platinum rod as counter electrode.

6

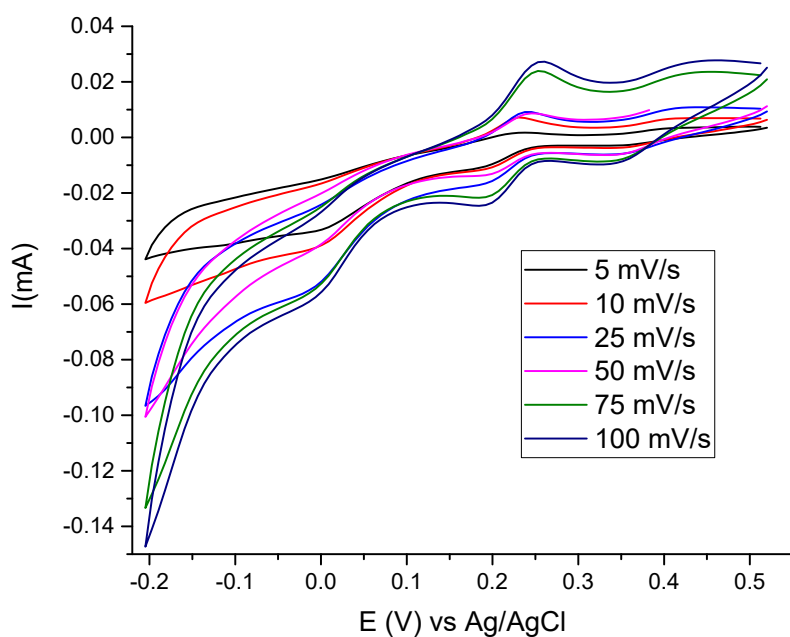

1

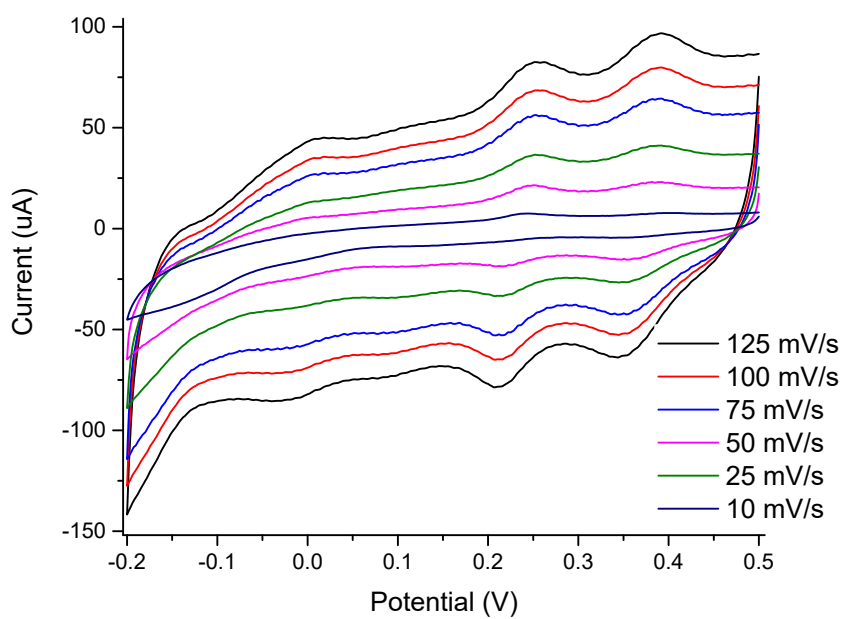

2

3 Figure S11. Cyclic voltammograms of  $\text{H}_3[\text{PMo}_{12}\text{O}_{40}]$  using a glassy carbon electrode as working  
 4 electrode in nitrogen saturated ethanol/aqueous 0.5 M  $\text{H}_2\text{SO}_4$  and aqueous 0.5 M  $\text{H}_2\text{SO}_4$  vs an  
 5 Ag/AgCl/KCl (3 M) reference electrode and a platinum rod as counter electrode.

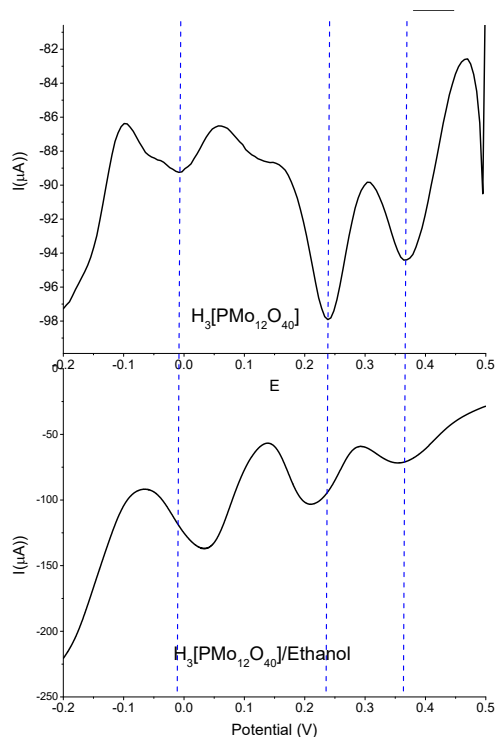

Figure S12. DPV of  $H_3[PMo_{12}O_{40}]$  using a glassy carbon electrode as working electrode in nitrogen saturated aqueous 0.5 M  $H_2SO_4$  and ethanol/aqueous 0.5 M  $H_2SO_4$  vs an Ag/AgCl/KCl (3 M) reference electrode and a platinum rod as counter electrode.

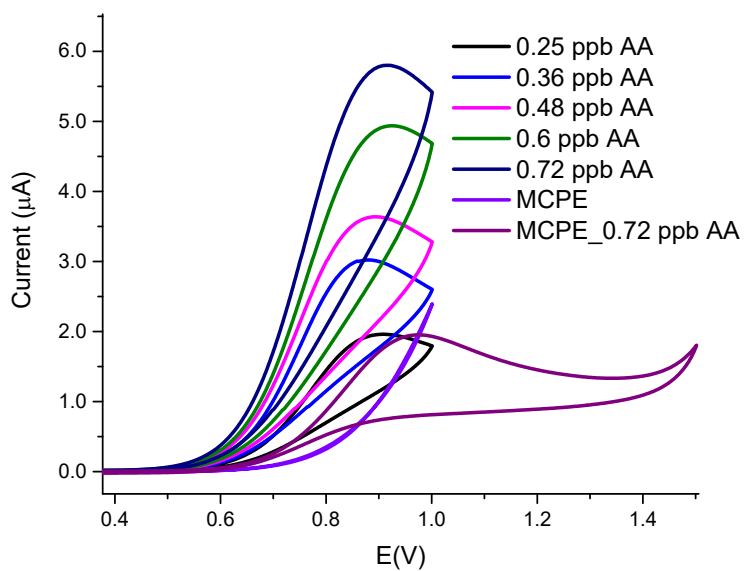

Figure S13. Electrocatalytic oxidation of ascorbic acid by employing POM-SiMe<sub>3</sub>-Chol-MSN. It is noteworthy that the oxidation peak current of AA appears at lower oxidation potential in the presence of the electrocatalyst and simultaneously the current intensity is enhanced sharply with the increased concentrations of ascorbic acid (AA) in comparison with the modified carbon paste electrode without catalyst (MCPE).

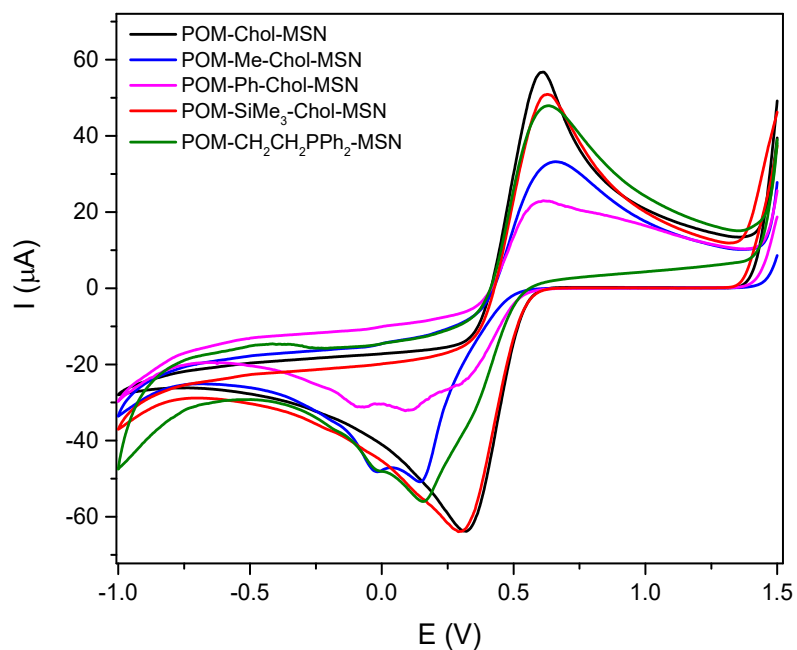

Figure S 14. cyclic voltammograms showing the modification of the materials recorded in 0.5 M  $\text{H}_2\text{SO}_4$  containing the redox system  $[\text{Fe}(\text{CN})_6]^{3-/4-}$ .

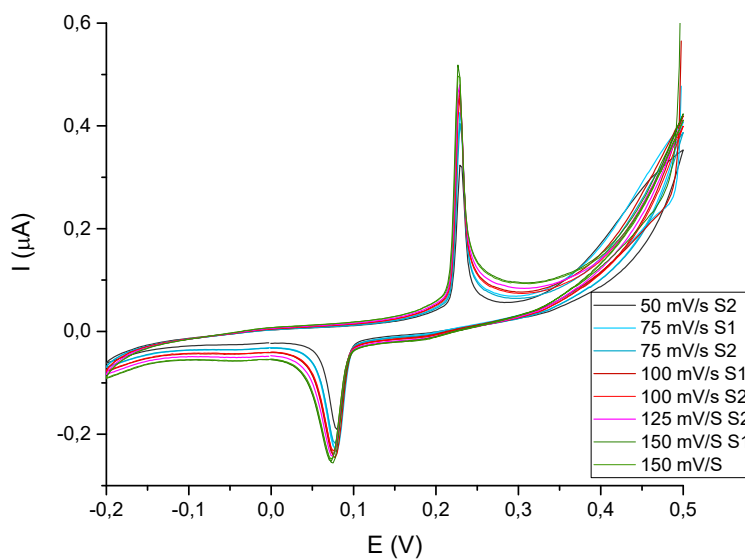

Figure S15. CV of POM-Chol-MSN after two consecutive experiments immobilized on a carbon modified electrode as working electrode in nitrogen saturated aqueous 0.5 M  $\text{H}_2\text{SO}_4$  vs an  $\text{Ag}/\text{AgCl}/\text{KCl}$  (3 M) reference electrode and a platinum rod as counter electrode.

Table S2. catalysts based on heterogenized phosphomolybdates for oxidation of DBT in model diesel fuel with H<sub>2</sub>O<sub>2</sub>.

|                                                                                                                            | W (wt%) <sup>a</sup> | Model oil / co-solvent      | Catalyst dosage        | O/S ratio | Temperature (°C) | Time (min) | Conversion (%) | Ref |
|----------------------------------------------------------------------------------------------------------------------------|----------------------|-----------------------------|------------------------|-----------|------------------|------------|----------------|-----|
| [Bmim] <sub>3</sub> PW <sub>12</sub> O <sub>40</sub> /20% SiO <sub>2</sub>                                                 | 13                   | toluene                     | 2 g/L                  | 3         | 50               | 120        | 100            | 2   |
| (IL) <sub>3</sub> PW <sub>12</sub> O <sub>40</sub> /SiO <sub>2</sub>                                                       | 2.8                  | Diesel                      | 2 g/L                  | 36        | 60               | 240        | 92             | 3   |
| (nBu <sub>4</sub> N) <sub>3</sub> {PO <sub>4</sub> [WO(O <sub>2</sub> ) <sub>2</sub> ] <sub>4</sub> } = (PW <sub>4</sub> ) | 38                   | Extractant acetonitrile     | 1mM                    | 7         | 70               | 240        | 97             | 4   |
| PW <sub>4</sub> @TMA-SBA-15                                                                                                | -                    | Extractant acetonitrile     | 1mM (PW <sub>4</sub> ) | 7         | 70               | 240        | 95             | 4   |
| TBA <sub>3</sub> PW <sub>12</sub> O <sub>4</sub> (PW <sub>12</sub> )                                                       | 63                   | n-octane/BMIPF <sub>6</sub> | 3μM                    | 7         | 50               | 60         | 100            | 5   |
| PW <sub>12</sub> @MIL-101                                                                                                  | 38                   | n-octane/BMIPF <sub>6</sub> | 17 g/L                 | 7         | 50               | 60         | 98             | 5   |
| HPW/SF-HPC (Hierarchical porous carbons)                                                                                   | 5                    | n-octane/methanol           | 10 g/L                 | 10        | 25               | 50         | 100            | 6   |

1 D. B. Williams and M. Lawton, *J. Org. Chem.*, 2010, **75**, 8351-8354 (DOI:10.1021/jo101589h).

2 J. Zhang, A. Wang, Y. Wang, H. Wang and J. Gui, *Chem. Eng. J.*, 2014, **245**, 65-70 (DOI:10.1016/j.cej.2014.01.103).

3 A. A. Bryzhin, M. G. Gantman, A. K. Buryak and I. G. Tarkhanova, *Applied Catalysis B: Environmental*, 2019, **257**, 117938 (DOI:10.1016/j.apcatb.2019.117938).

4 D. Julião, F. Mirante, S. O. Ribeiro, A. C. Gomes, R. Valença, J. C. Ribeiro, M. Pillinger, B. de Castro, I. S. Gonçalves and S. S. Balula, *Fuel*, 2019, **241**, 616-624 (DOI:10.1016/j.fuel.2018.11.095).

5 S. Ribeiro, A. D. S. Barbosa, A. C. Gomes, M. Pillinger, I. S. Gonçalves, L. Cunha-Silva and S. S. Balula, *Fuel Process Technol*, 2013, **116**, 350-357 (DOI:10.1016/j.fuproc.2013.07.011).

6 B. Wang, L. Kang and M. Zhu, *Nanomaterials*, 2021, **11** (DOI:10.3390/nano11092369).
